# Supplementary material for: Delineating the intricacies of niobium-modified high-nickel layered cathodes with a single-step synthesis
Source: Royal Society of Chemistry journal article supplement (doi:10.1039/d4ta05544f), 2024-01-01
Supplement: d4ta05544f1.pdf [file d4ta05544f1.pdf]

## Supporting Information

### **Delineating the intricacies of niobium-modified high-nickel layered cathodes with a single-step synthesis**

Thomas J. Watts and Arumugam Manthiram

*Walker Department of Mechanical Engineering and Texas Materials Institute  
The University of Texas at Austin  
Austin, Texas 78712, United States*

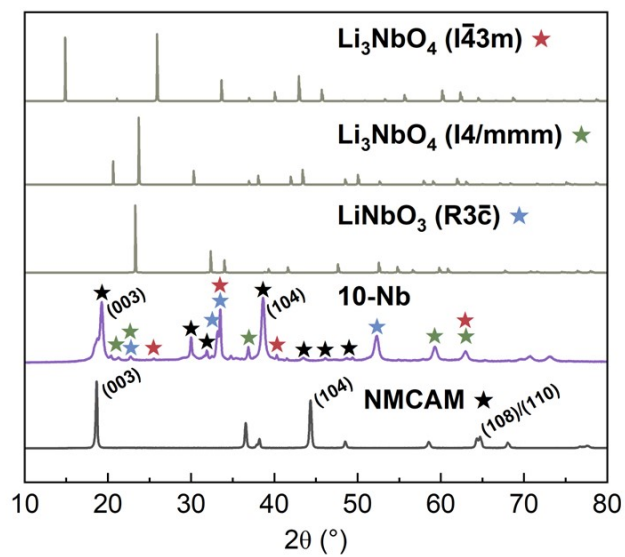

**Figure S1.** XRD analysis of the unmodified NMCAM and the 10-Nb sample compared to the calculated powder diffraction patterns of  $\text{LiNbO}_3$  and  $\text{Li}_3\text{NbO}_4$ .

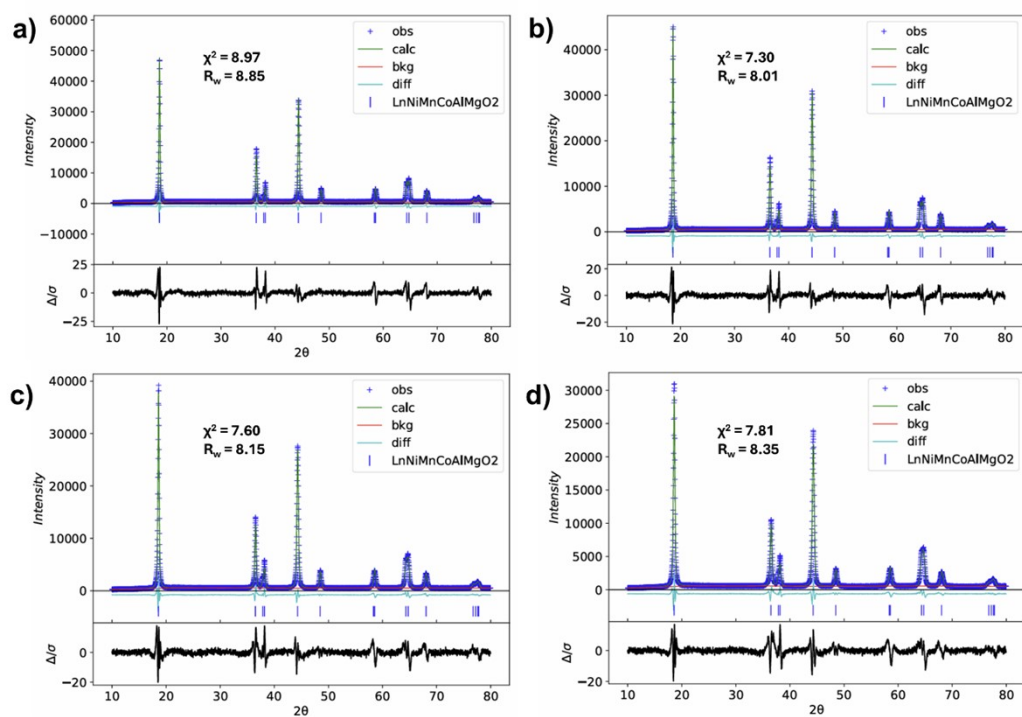

**Figure S2.** Rietveld refinement results for (a) NMCAM [1% ex LiOH], (b) 0.5-Nb [5.5% ex LiOH], (c) 1.0-Nb [7% ex LiOH], and (d) 2.0-Nb samples [10% ex LiOH].

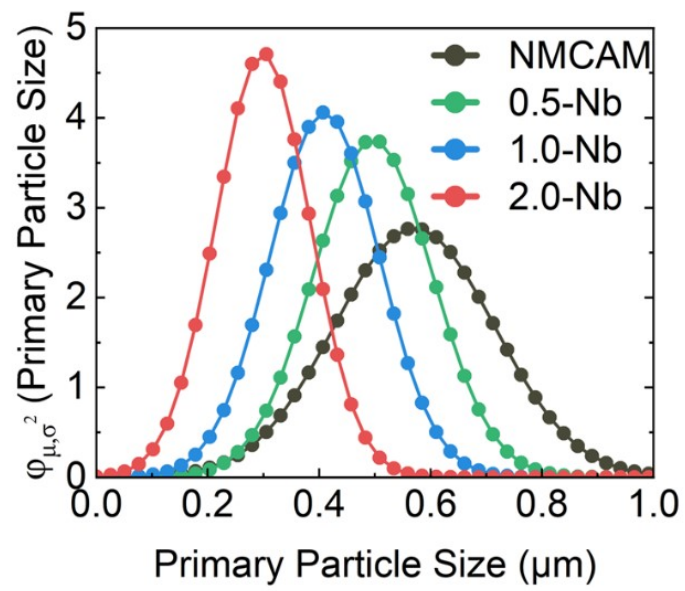

**Figure S3.** Distribution of primary particle size.

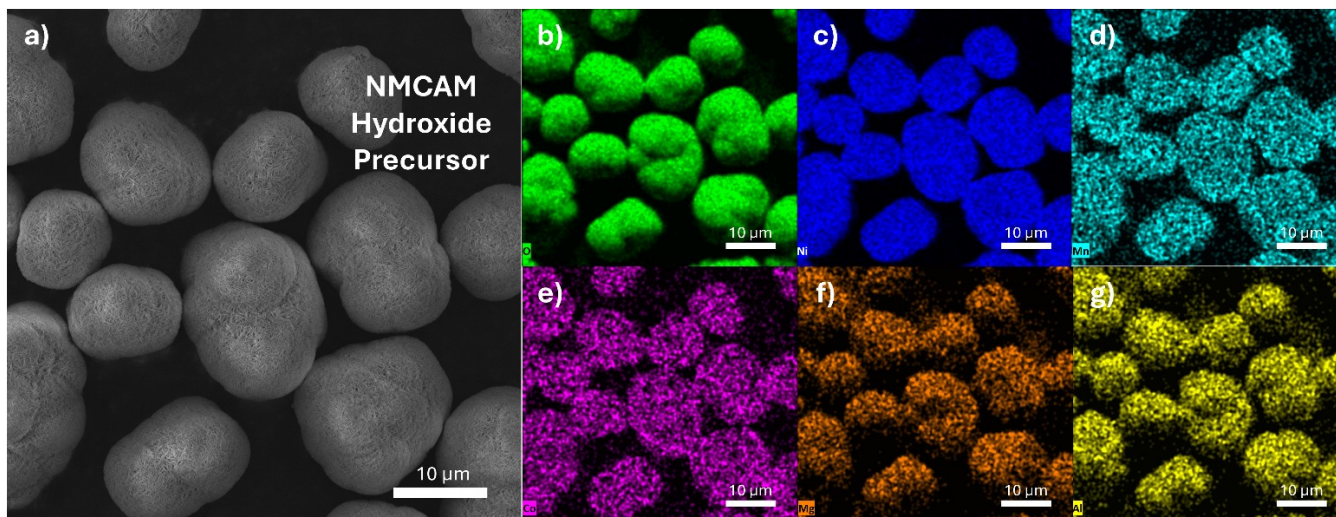

**Figure S4.** (a) SEM image of NMCAM hydroxide precursor. Elemental maps of the image for (b) oxygen, (c) nickel, (d) manganese, (e) cobalt, (f) magnesium, and (g) aluminum.

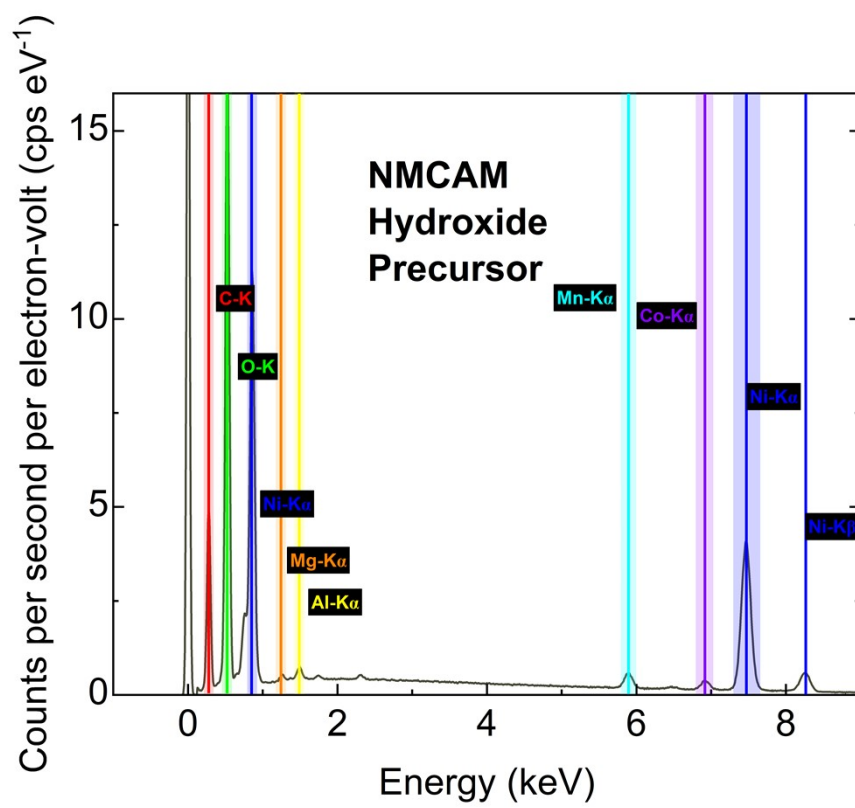

**Figure S5.** EDX spectra of NMCAM hydroxide precursor

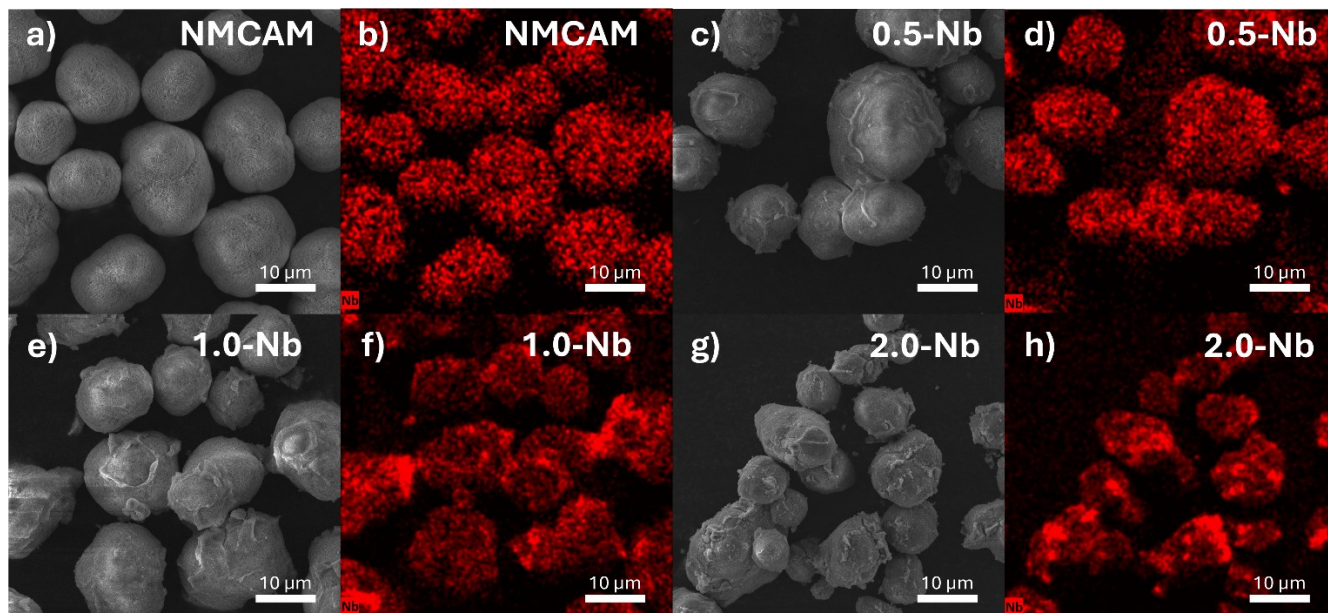

**Figure S6.** SEM image of hydroxide precursor and its corresponding Nb elemental map of (a) and (b) NMCAM, (c) and (d) 0.5-Nb, (e) and (f) 1.0-Nb, (g) and (h) 2.0-Nb samples.

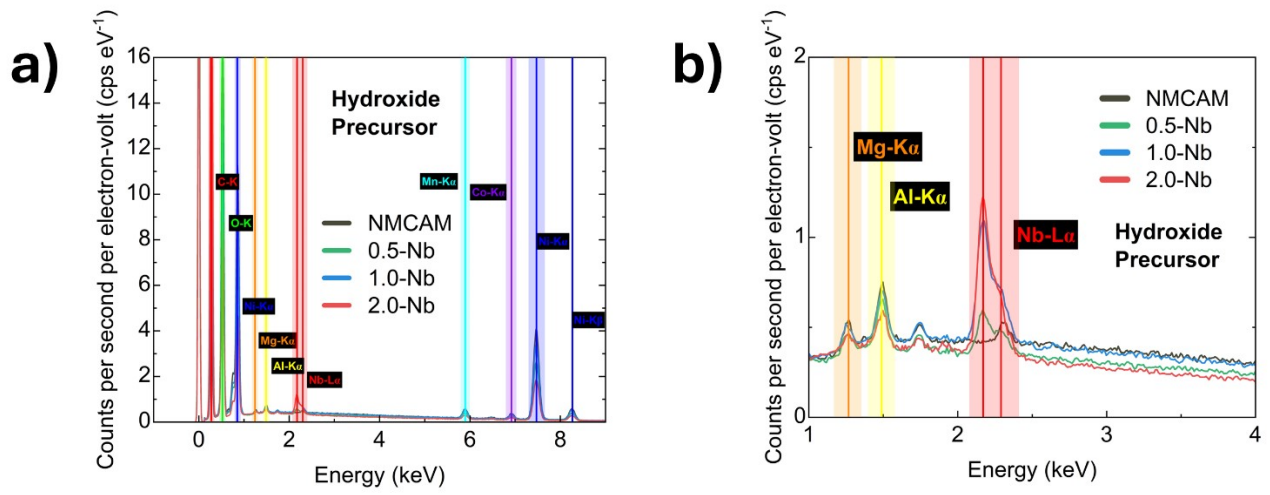

**Figure S7.** (a) EDX spectra of the hydroxide precursors after coating with ANO. (b) EDX spectra of the hydroxide precursors magnified to focus on the Mg-K $\alpha$ , Al-K $\alpha$ , and Nb-L $\alpha$  peaks.



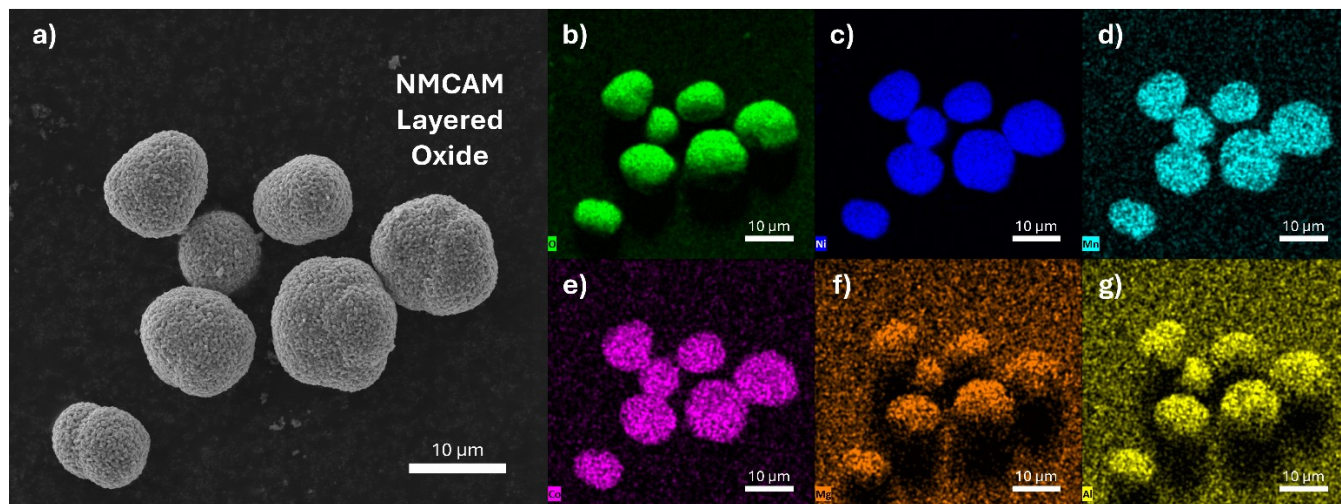

**Figure S8.** (a) SEM image of NMCAM layered oxide. Elemental maps of the image for (b) oxygen, (c) nickel, (d) manganese, (e) cobalt, (f) magnesium, and (g) aluminum.

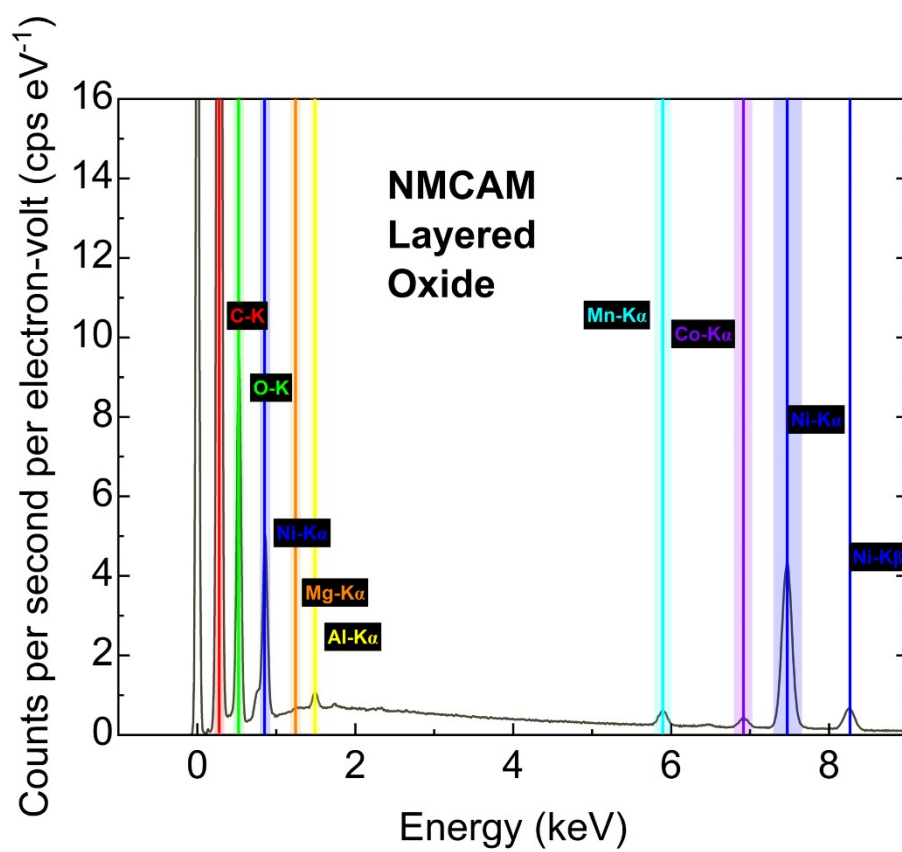

**Figure S9.** EDX spectra of NMCAM layered oxide

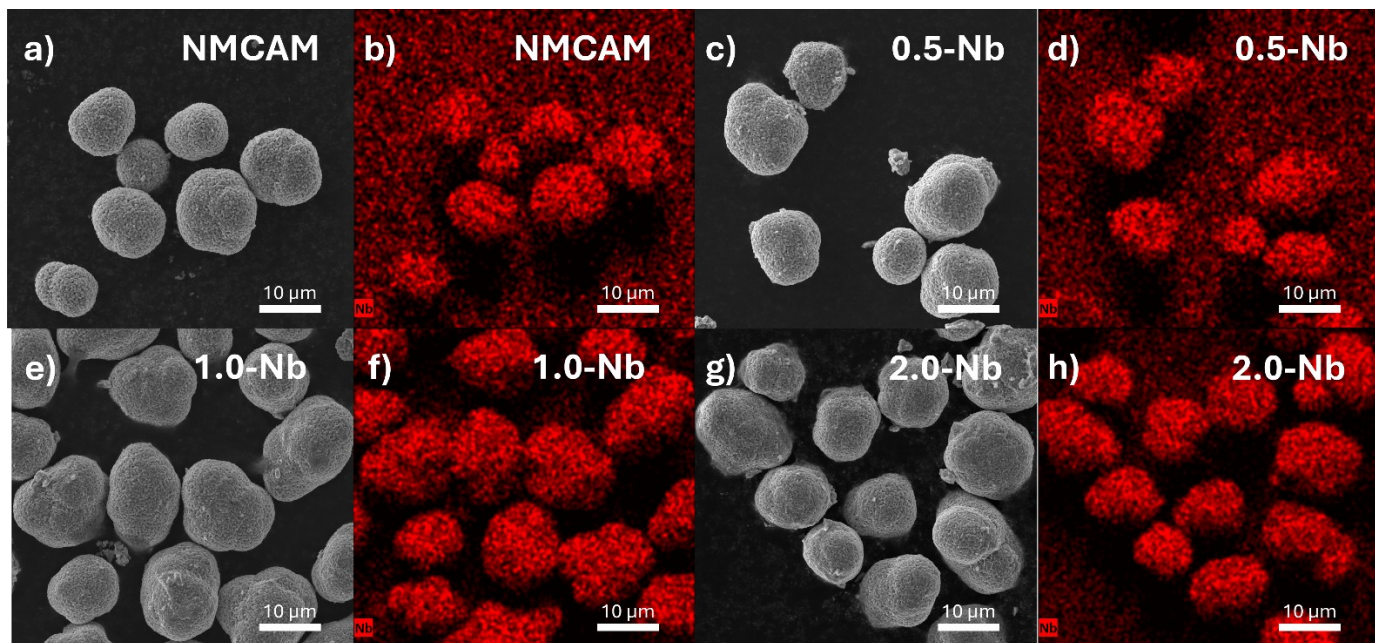

**Figure S10.** SEM image of layered oxide particles and its corresponding Nb elemental map of (a) and (b) NMCAM, (c) and (d) 0.5-Nb, (e) and (f) 1.0-Nb, (g) and (h) 2.0-Nb samples.

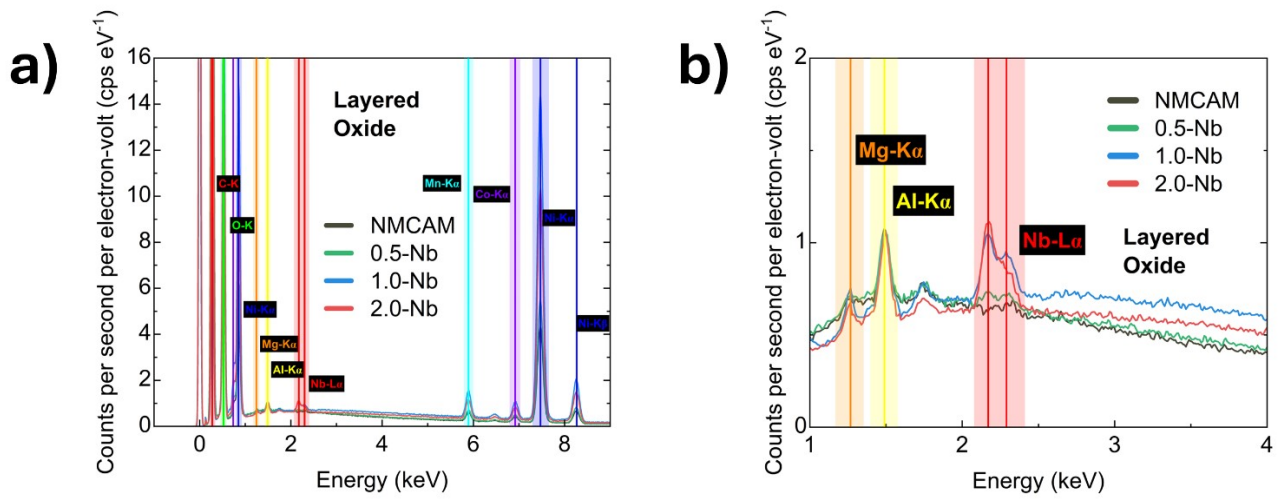

**Figure S11.** (a) EDX spectra of the layered oxide samples after coating with ANO. (b) EDX spectra of the layered oxide samples magnified to focus on the Mg-K $\alpha$ , Al-K $\alpha$ , and Nb-L $\alpha$  peaks.

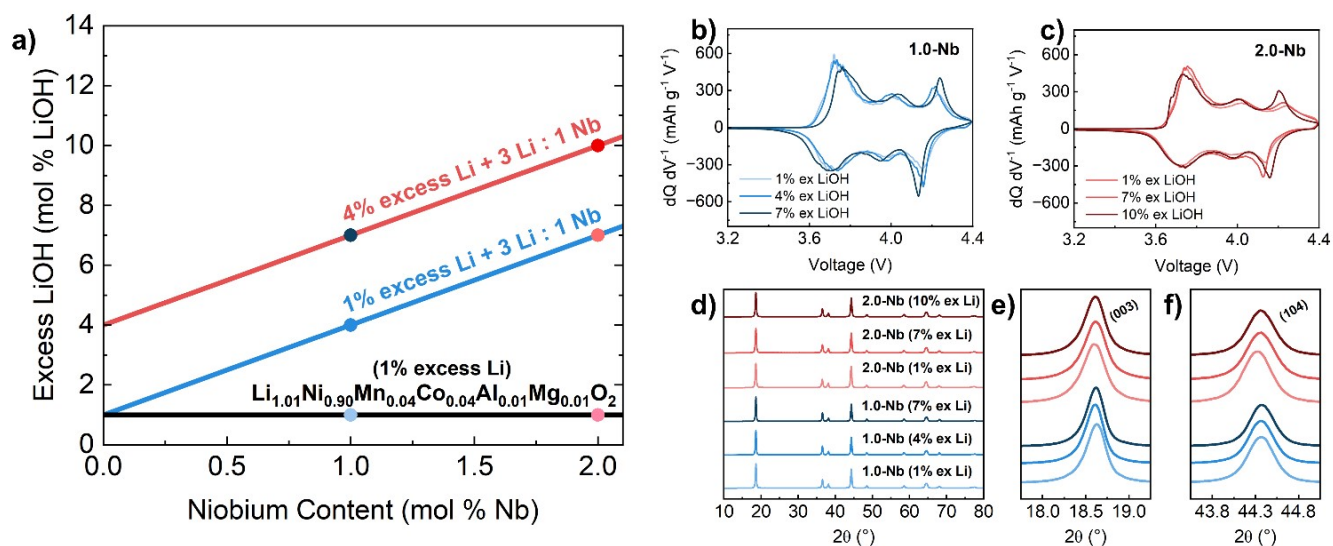

**Figure S12.** (a) Variation of excess LiOH ratio vs. Nb content.  $dQ dV^{-1}$  vs. voltage plots at C/3 rate of (b) 1.0-Nb and (c) 2.0-Nb samples. (d) Full XRD patterns of 1.0-Nb and 2.0-Nb samples with various excess LiOH contents and (e) (003) peak and (f) (104) peak magnified over a narrow  $2\theta$  range.

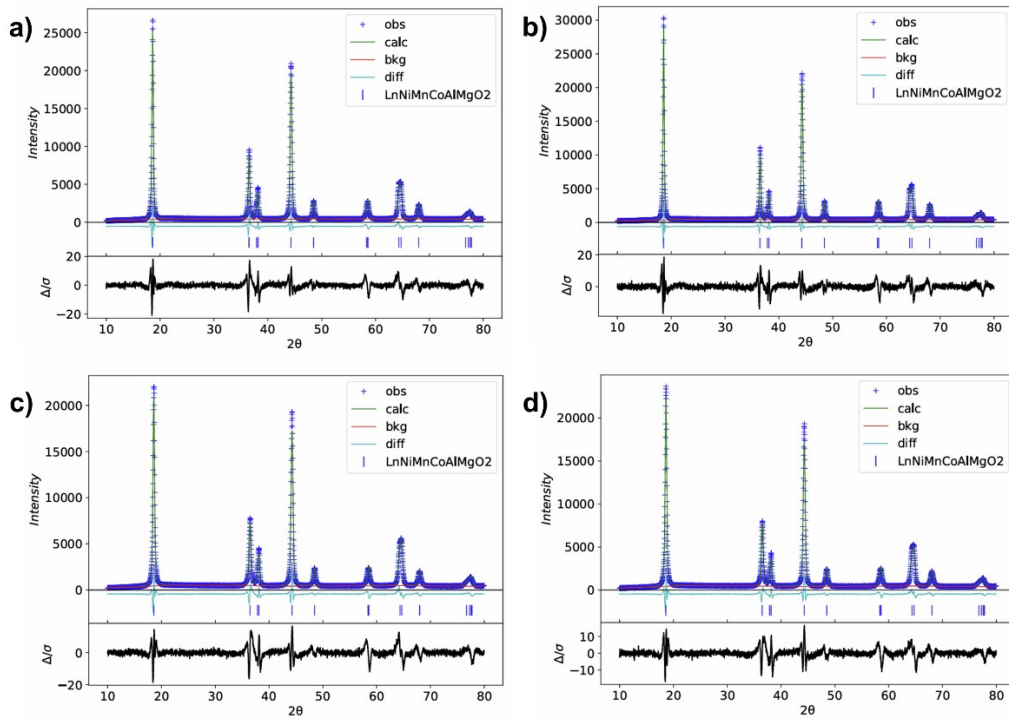

**Figure S13.** Rietveld refinement results for (a) 1.0-Nb [1% ex LiOH], (b) 1.0-Nb [4% ex LiOH], (c) 2.0-Nb [1% ex LiOH], and (d) 2.0-Nb [7% ex LiOH].

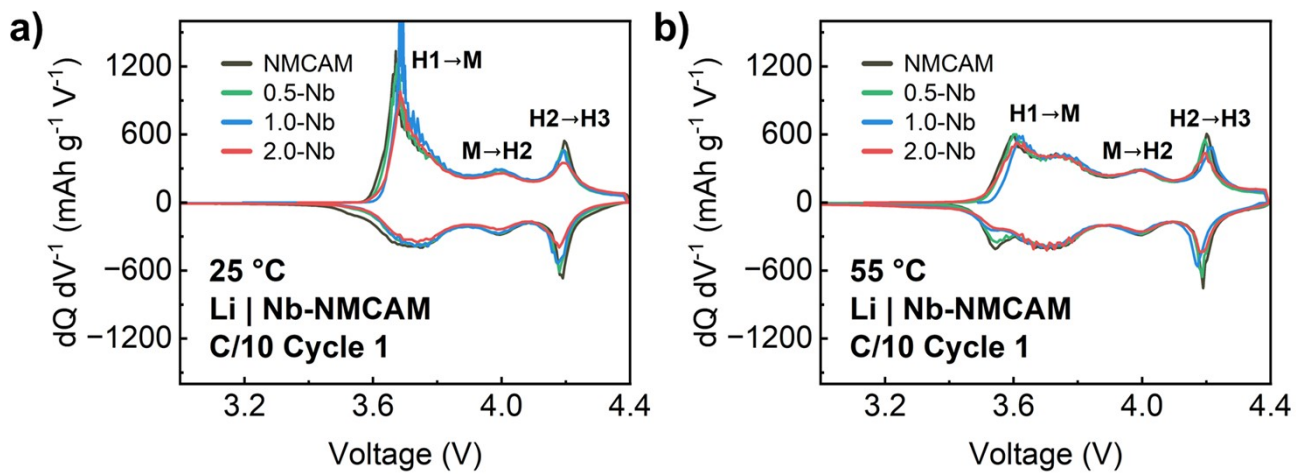

**Figure S14.**  $dQ dV^{-1}$  vs. voltage plots for half cells during the initial C/10 formation cycle at (a) 25 °C, and (b) 55 °C.

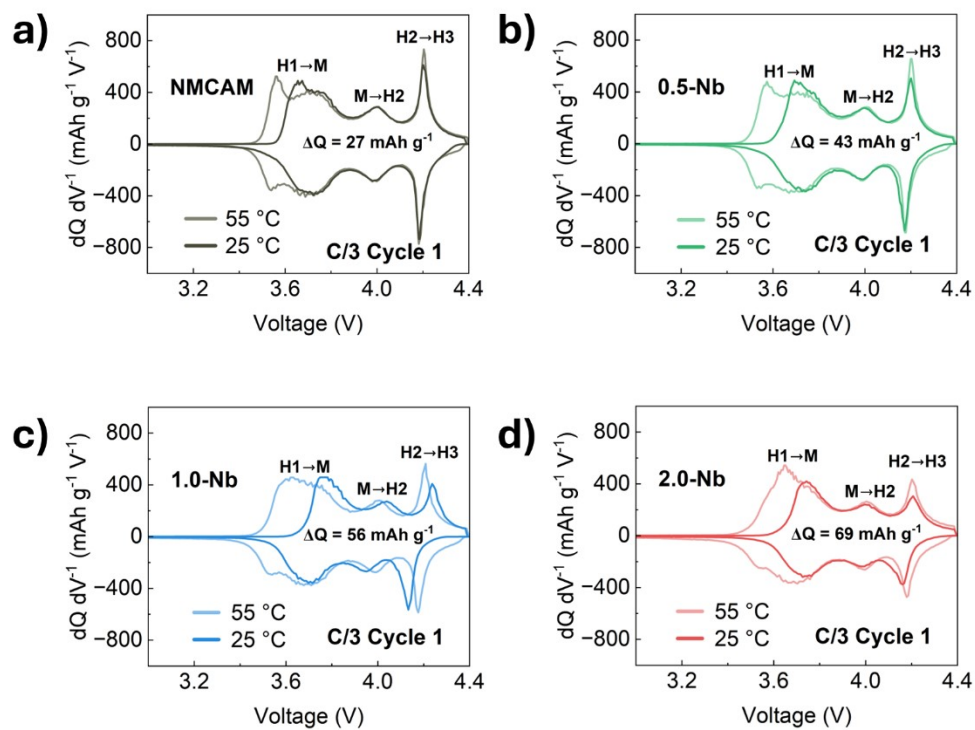

**Figure S15.**  $dQ dV^{-1}$  vs. voltage plots depicting the origins of room-temperature capacity loss for (a) NMCAM, (b) 0.5-Nb, (c) 1.0-Nb, and (d) 2.0-Nb samples.



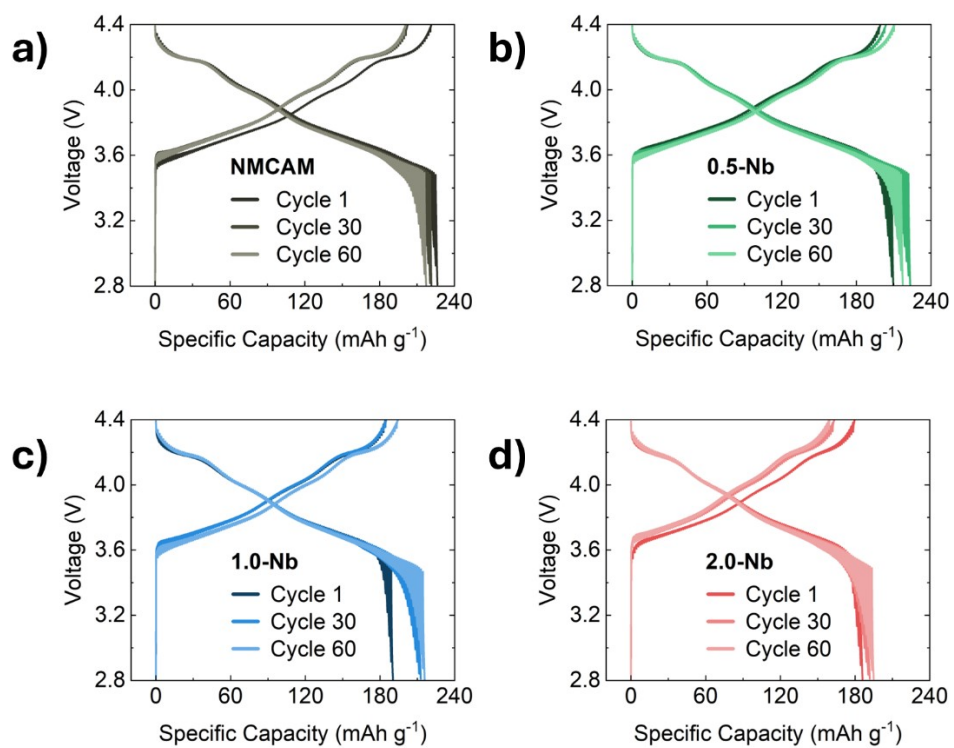

**Figure S16.** Voltage vs. specific capacity plots of GITT cycles for (a) NMCAM, (b) 0.5-Nb, (c) 1.0-Nb, and (d) 2.0-Nb samples.

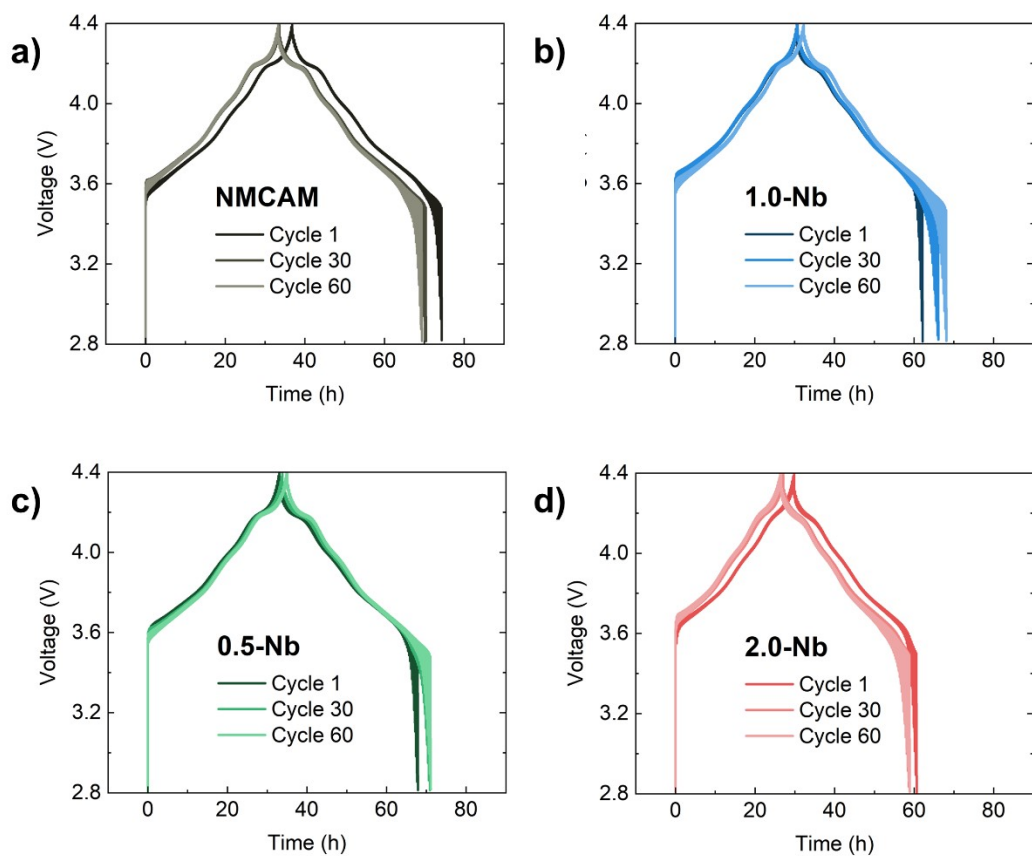

**Figure S17.** Voltage vs. specific capacity plots of GITT cycles for (a) NMCAM, (b) 0.5-Nb, (c) 1.0-Nb, and (d) 2.0-Nb samples.

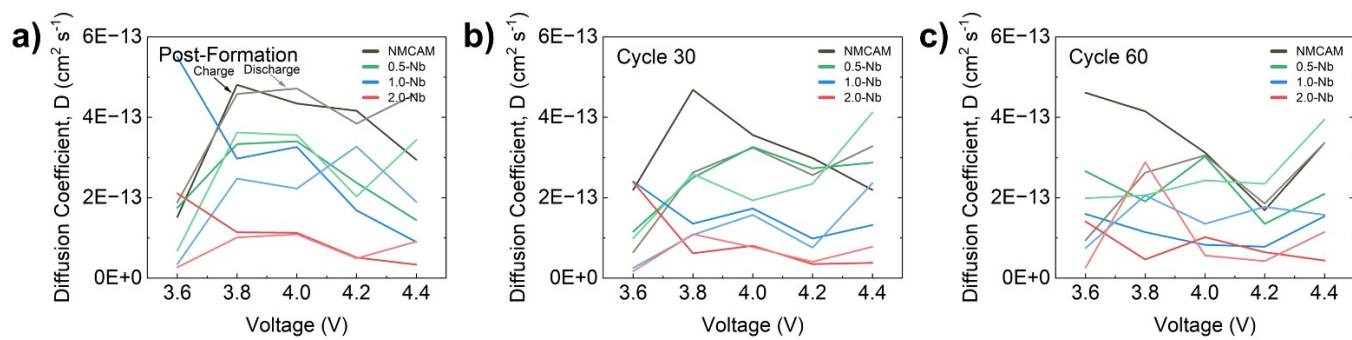

**Figure S18.** Li<sup>+</sup> diffusion coefficient vs. voltage plots for Nb-modified NMCAM samples after (a) formation cycling, (b) 30 C/3 cycles, and (c) 60 C/3 cycles.

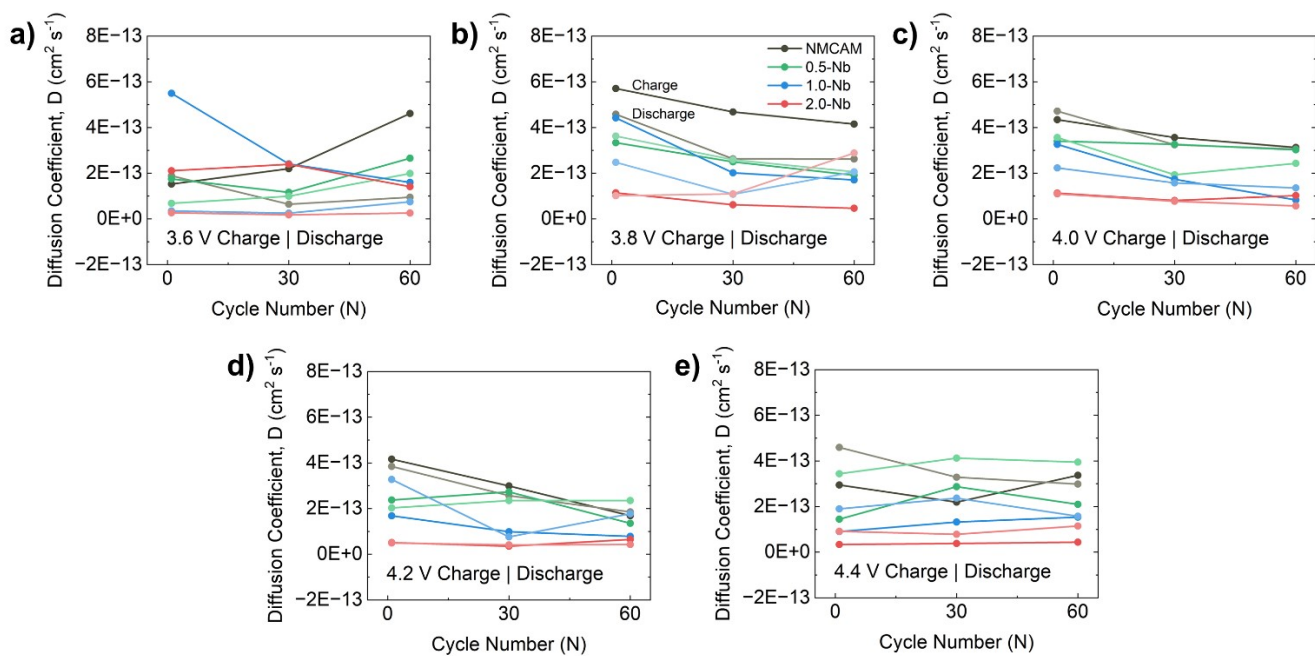

**Figure S19.** Li<sup>+</sup> diffusion coefficient vs. cycle number for Nb-modified NMCAM samples at (a) 3.6 V, (b) 3.8 V, (c) 4.0 V, (d) 4.2 V, (e) 4.4 V.

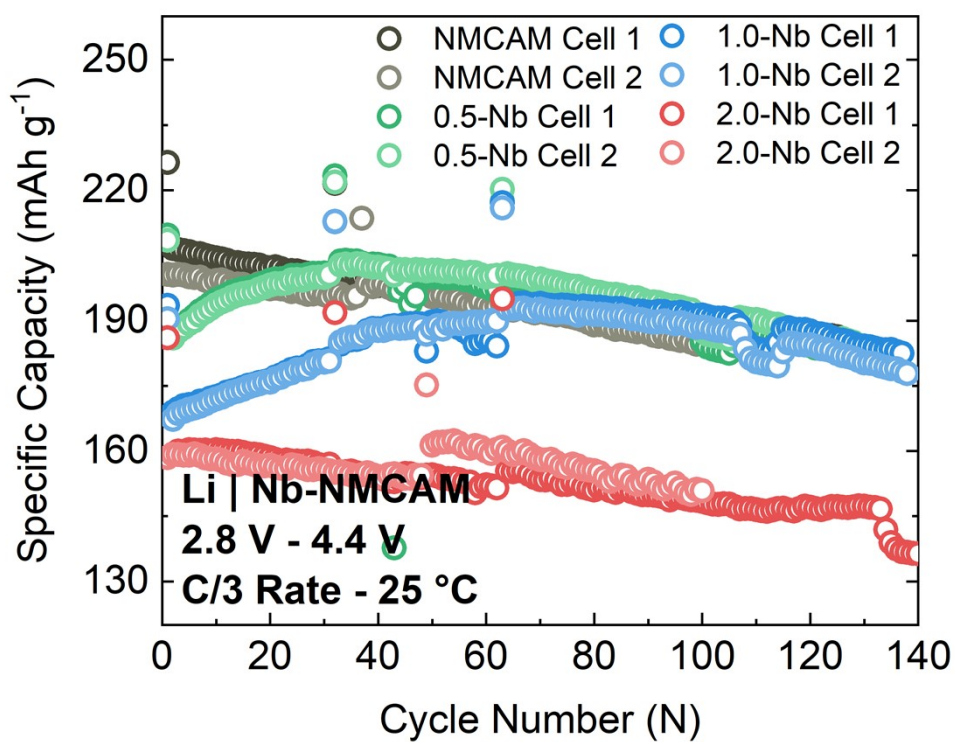

**Figure S20.** Specific capacity vs. cycle number plots of Nb-modified half cells, with GITT measured after the formation cycles (included in the plot) and at C/3 rate at cycles 30 and 60 (cycle numbers 34 and 64 in the plot).

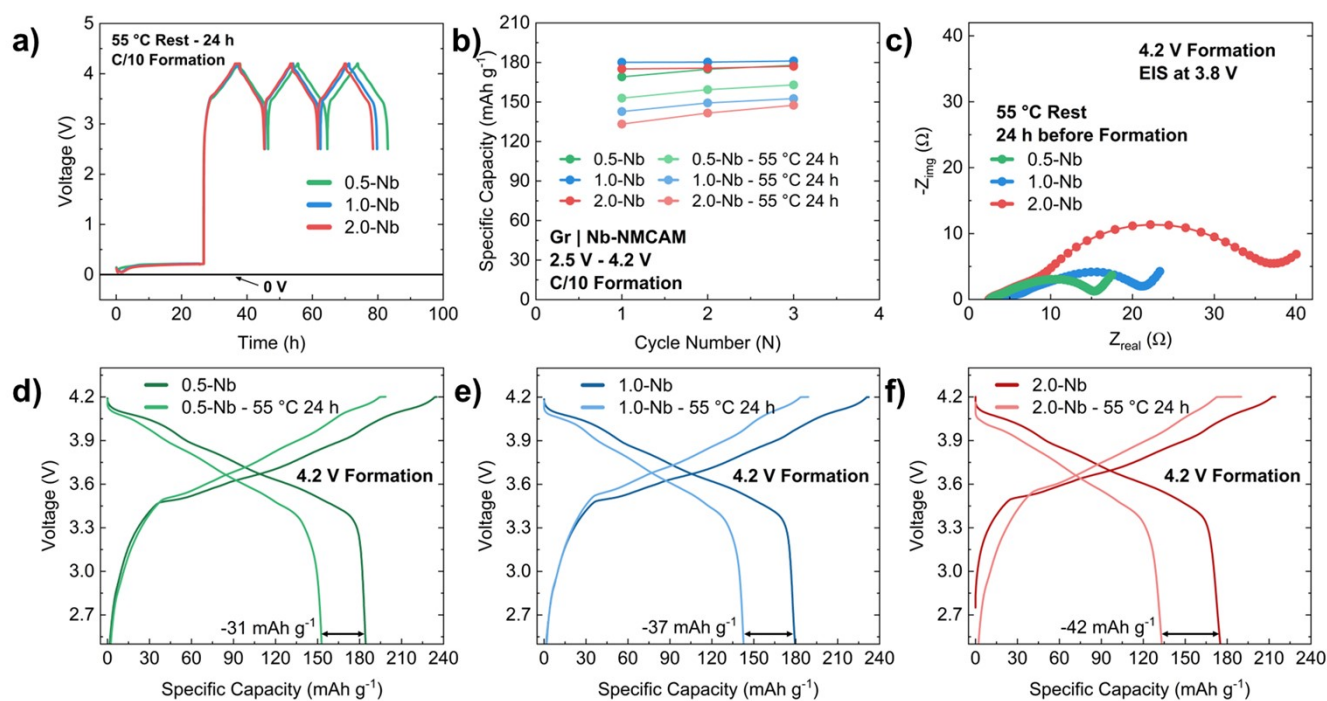

**Figure S21.** Electrochemical performance of coin full cells cycled at room temperature after a 24 h rest at 55 °C after cell assembly. (a) Voltage vs. time including 24 h rest, (b) Specific capacity vs. cycle number for formation cycles. (c) Nyquist plot of all full cells charged to 3.8 V after formation. Voltage vs. specific capacity plots of the first C/10 formation cycle of cells experiencing the 55 °C rest and those without the 55 °C rest for (d) 0.5-Nb, (e) 1.0-Nb, and (f) 2.0-Nb.

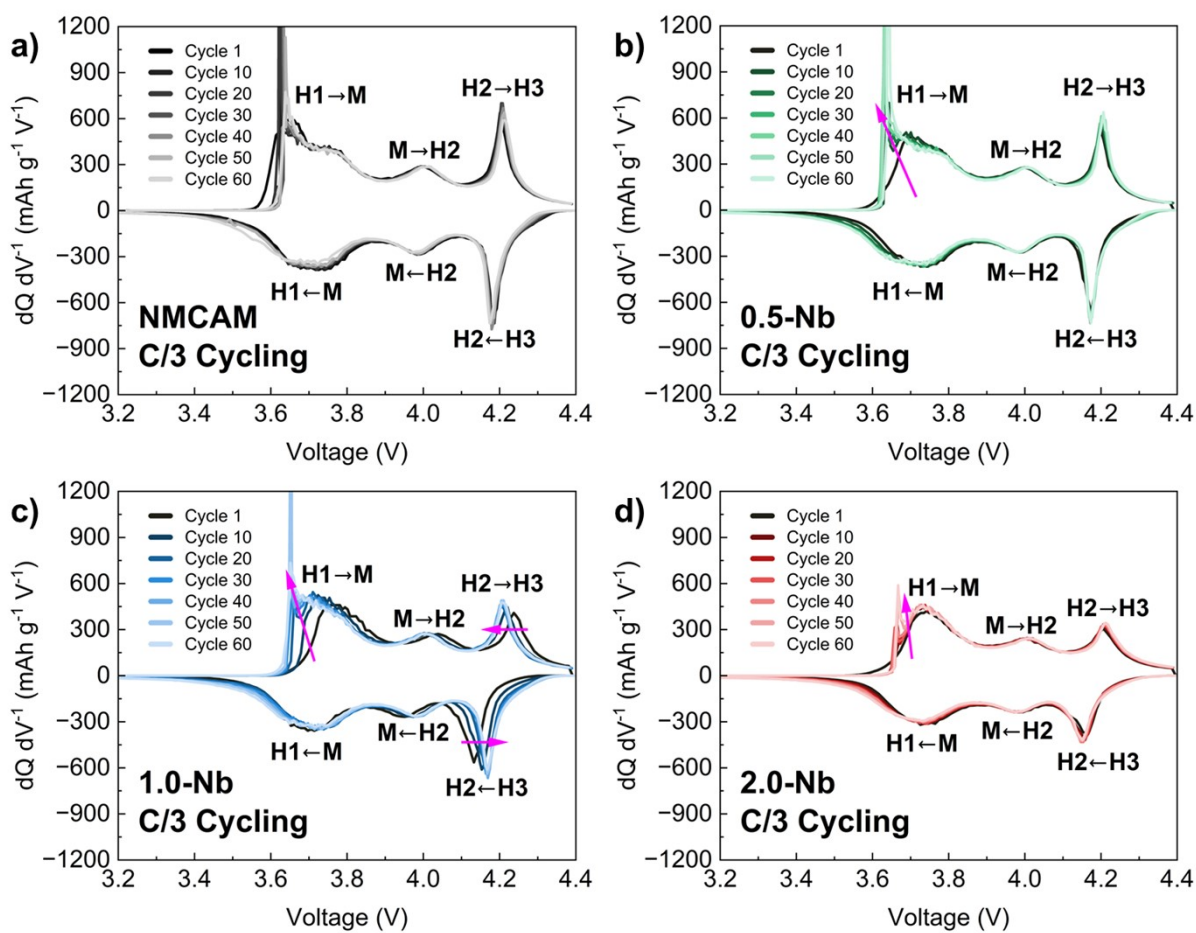

**Figure S22.**  $dQ/dV$  vs voltage plots for (a) NMCAM, (b) 0.5-Nb, (c) 1.0-Nb, and (d) 2.0-Nb after formation, and at C/3 cycle number 10, 20, 30, 40, 50, and 60.

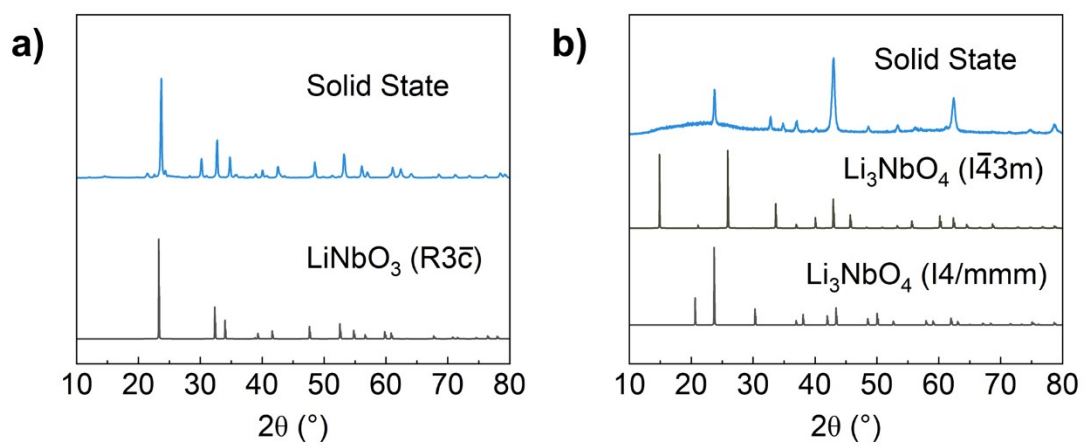

**Figure S23.** XRD analysis of (a)  $\text{LiNbO}_3$  and (b)  $\text{Li}_3\text{NbO}_4$  compared to calculated powder diffraction patterns of matching phases.



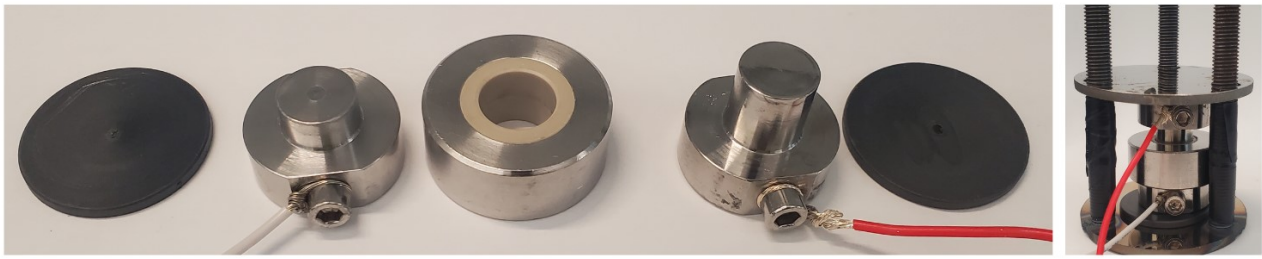

**Figure S24.** Images of cell components utilized to measure the electronic conductivities of lithium niobate powders, and the assembled cell.

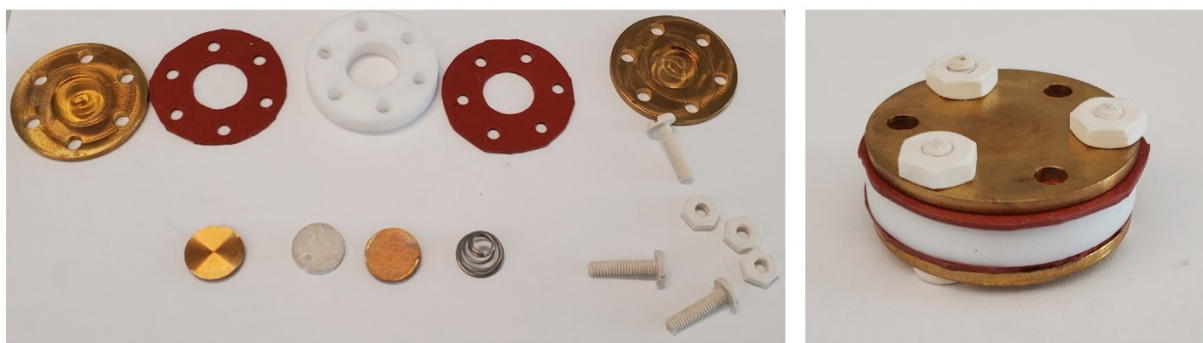

**Figure S25.** Images of cell components utilized to measure the ionic conductivities of lithium niobate powders, and the assembled cell.

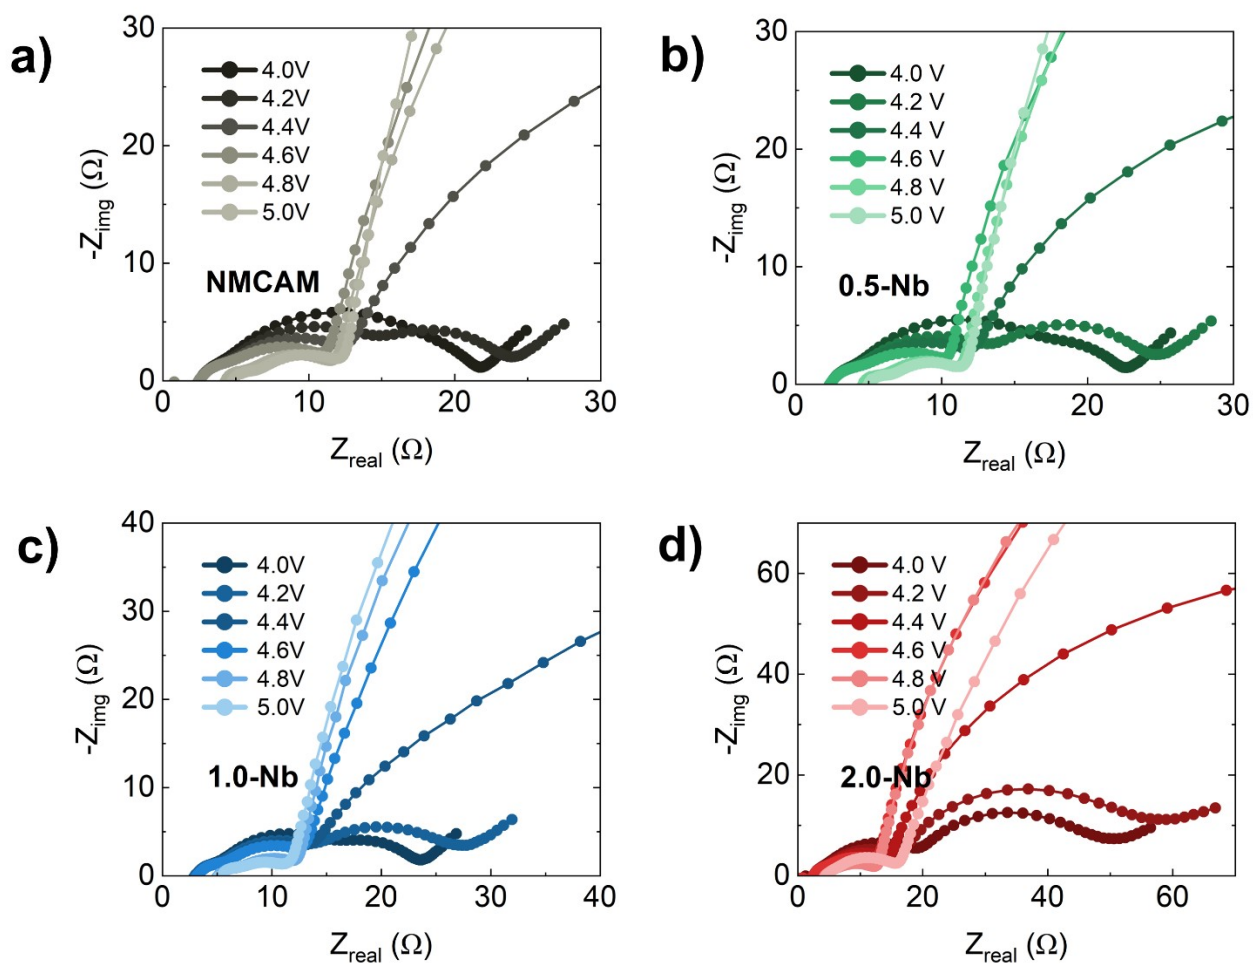

**Figure S26.** Nyquist plots of (g) NMCAM, (h) 0.5-Nb, (i) 1.0-Nb, (j) 2.0-Nb samples. EIS was collected during formation cycling to 5.0 V every 200 mV.

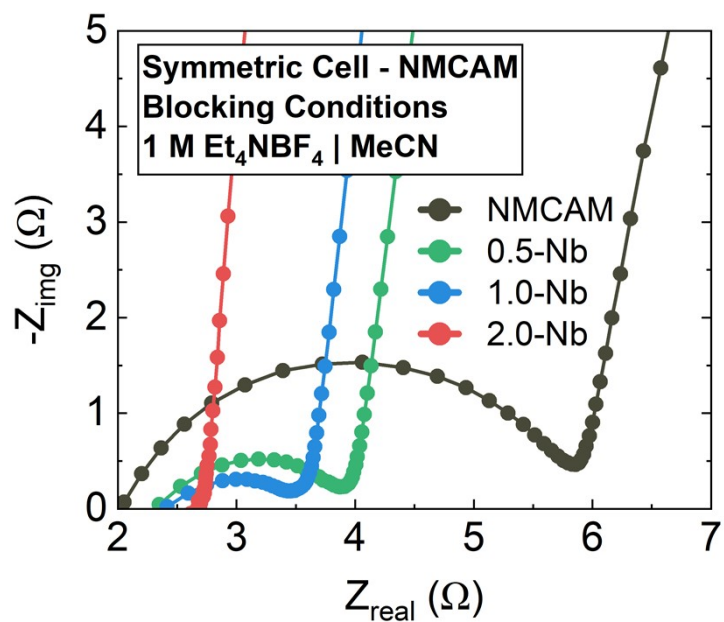

**Figure S27.** Nyquist plots of NMCAM and Nb-modified NMCAM symmetric cells under blocking conditions at room temperature.

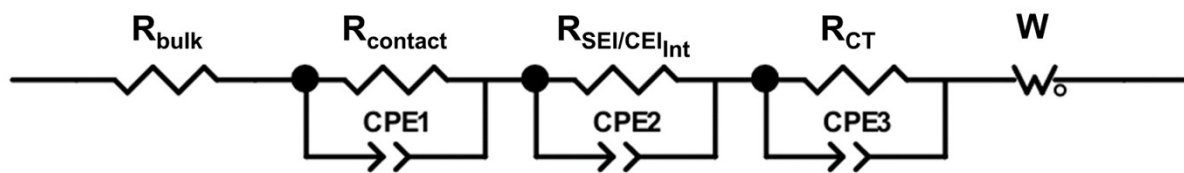

**Figure S28.** EIS Equivalent-circuit model.

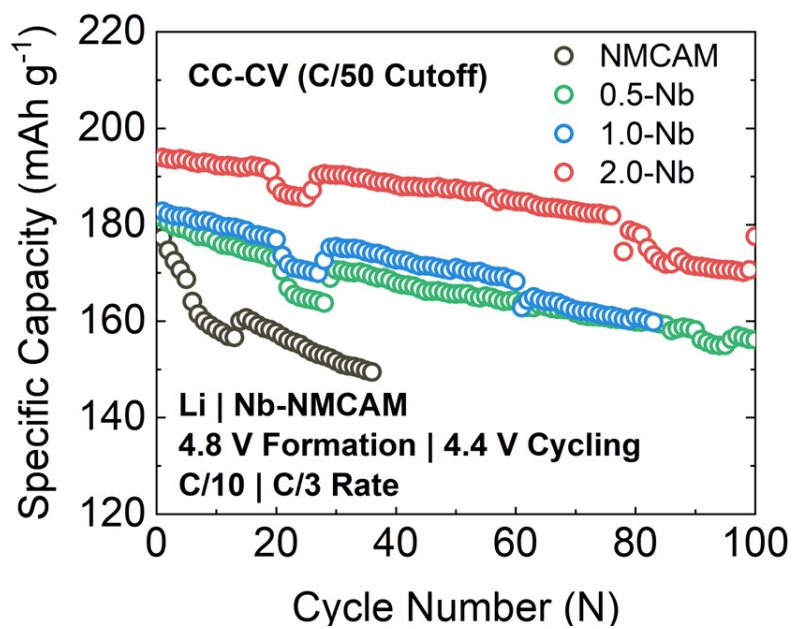

**Figure S29.** Electrochemical performance of Nb-NMCAM samples cycled under a 4.8 V CC-CV formation at a C/50 cutoff, followed by C/3 rate cycling at 4.4 V cutoff.

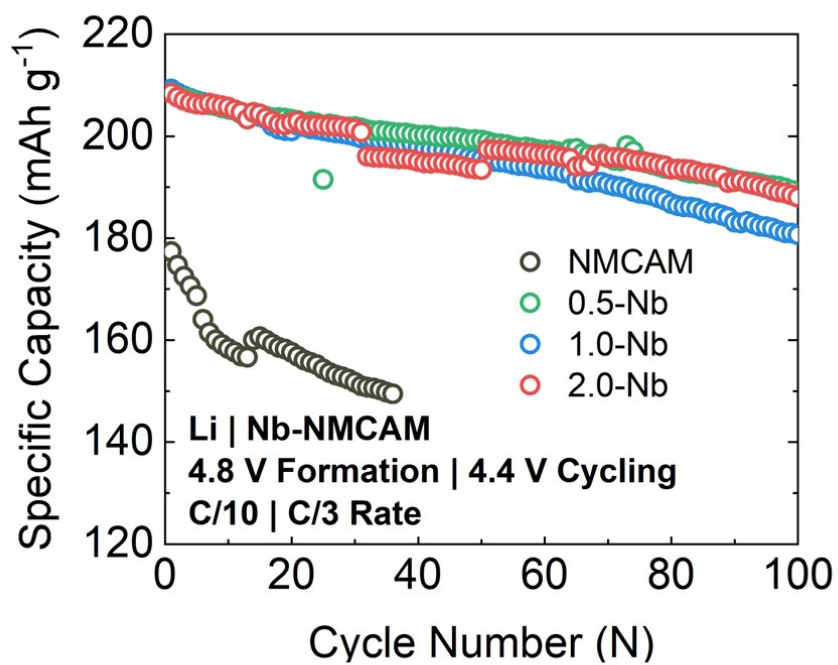

**Figure S30.** Electrochemical performances of Nb-NMCAM samples cycled under a 4.8 V CC-CV formation at C/10 rate for two cycles, followed by C/3 rate cycling at 4.4 V cutoff.

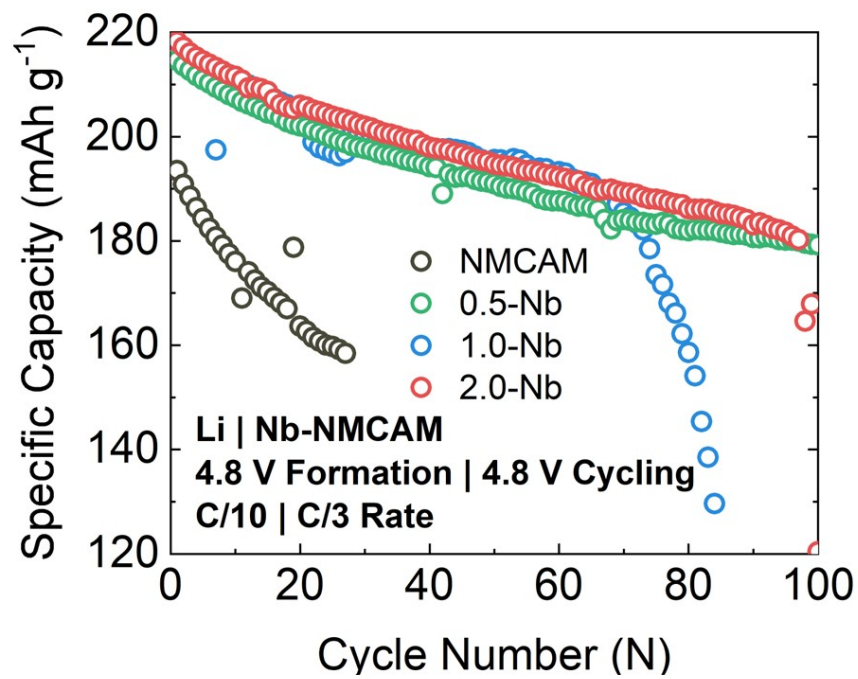

**Figure S31.** Electrochemical performances of Nb-NMCAM samples cycled under a 4.8 V CC-CV formation at C/10 rate for two cycles, followed by C/3 rate cycling at a 4.8 V cutoff.



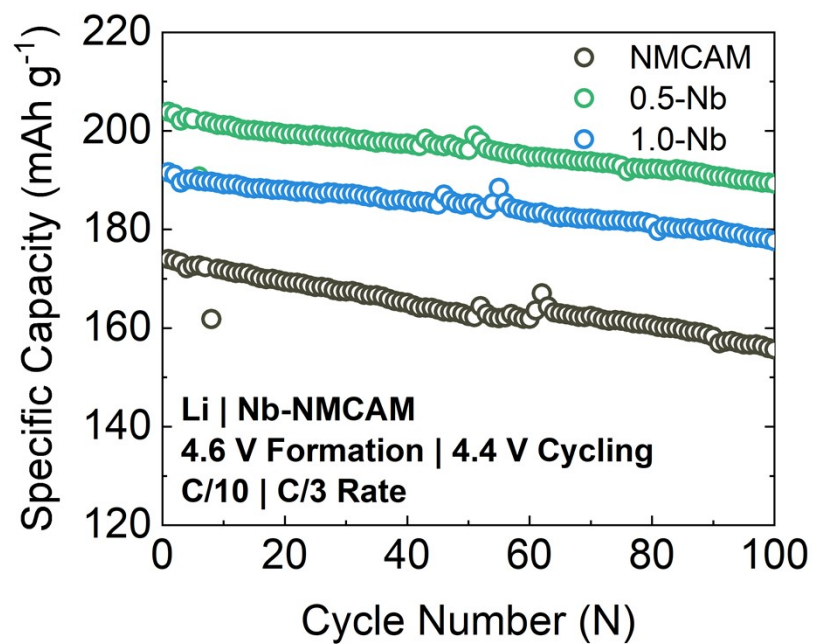

**Figure S32.** Electrochemical performances of Nb-NMCAM samples cycled under a 4.6 V CC-CV formation at C/10 rate for two cycles, followed by C/3 rate cycling at 4.4 V cutoff.

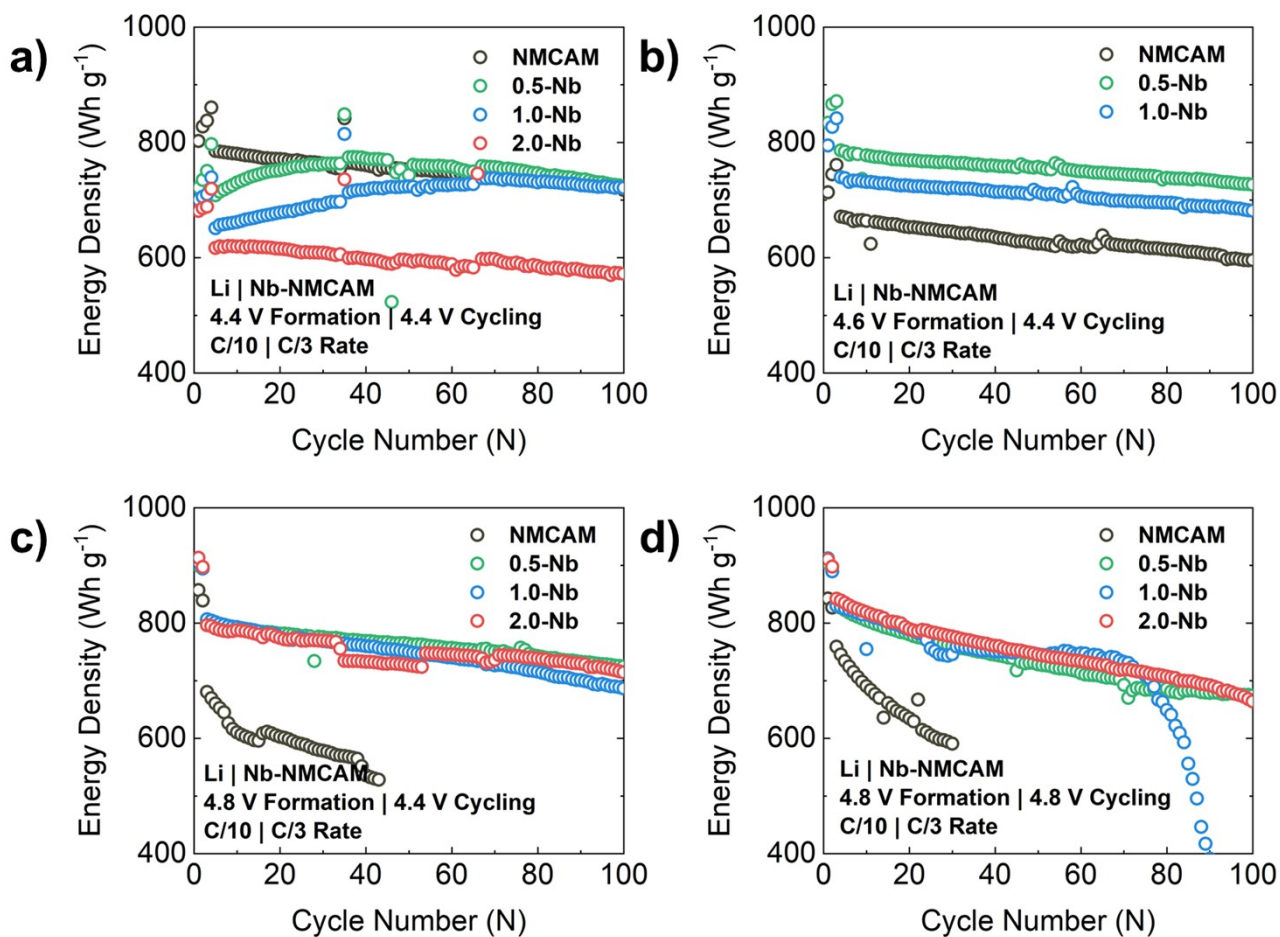

**Figure S33.** Specific energy vs. cycle number of NMCAM, 0.5-Nb, 1.0-Nb, and 2.0-Nb half cells cycled at (a) 4.4 V cutoff for C/10 formation and C/3 cycling, (b) 4.6 V cutoff for C/10 formation and 4.4 V cutoff for C/3 cycling, (c) 4.8 V cutoff for C/10 formation and 4.4 V cutoff for C/3 cycling, and (c) 4.8 V cutoff for C/10 formation and C/3 cycling.

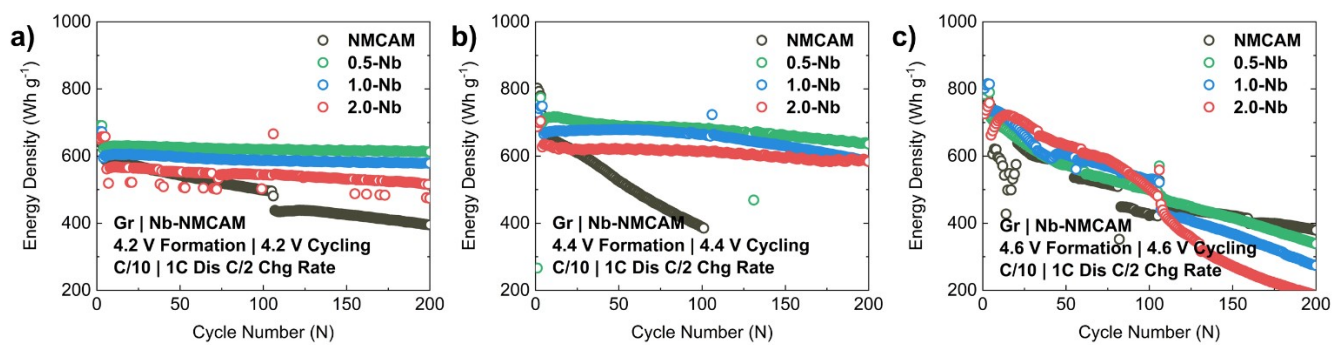

**Figure S34.** Specific energy vs. cycle number of NMCAM, 0.5-Nb, 1.0-Nb, and 2.0-Nb full cells cycled at (a) 4.2 V cutoff, (b) 4.4 V cutoff, and (c) 4.6 V cutoff.

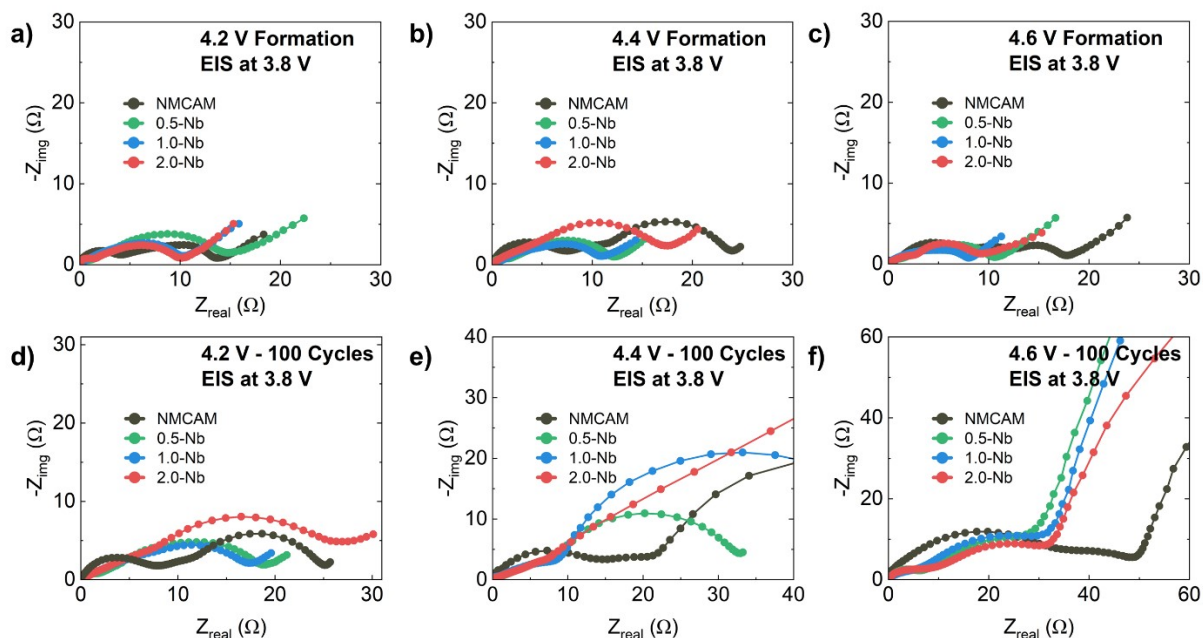

**Figure S35.** Nyquist plots of NMCAM and Nb-modified NMCAM full cells after three C/10 formation cycles, employing a (a) 4.2 V cutoff, (b) 4.4 V cutoff, and (c) 4.6 V cutoff, and after 100 cycles at C/2 charge - 1 C discharge, employing a (a) 4.2 V cutoff, (b) 4.4 V cutoff, and (c) 4.6 V cutoff.

**Table S1.** Summary of Rietveld refinement results for the Nb-modified NMCAM samples

|                 | <b>ex Li</b> | <b>FWHM<br/>(003)</b> | <b>FWHM<br/>(104)</b> | <b>a (Å)</b> | <b>c (Å)</b> | <b>Li<sup>+</sup> / Ni<sup>2+</sup></b> | <b>X<sup>2</sup></b> | <b>R<sub>w</sub></b> |
|-----------------|--------------|-----------------------|-----------------------|--------------|--------------|-----------------------------------------|----------------------|----------------------|
| <b>Baseline</b> | 1%           | 0.203                 | 0.270                 | 2.8731       | 14.1970      | 0.956 / 0.044                           | 8.97                 | 8.85                 |
| <b>0.5-Nb</b>   | 5.5%         | 0.213                 | 0.290                 | 2.8725       | 14.2006      | 0.963 / 0.037                           | 7.30                 | 8.01                 |
| <b>1.0-Nb</b>   | 1%           | 0.280                 | 0.360                 | 2.8731       | 14.1897      | 0.926 / 0.074                           | 6.74                 | 8.55                 |
| <b>1.0-Nb</b>   | 4%           | 0.240                 | 0.360                 | 2.8727       | 14.1965      | 0.953 / 0.047                           | 6.01                 | 8.02                 |
| <b>1.0-Nb</b>   | 7%           | 0.238                 | 0.325                 | 2.8726       | 14.1974      | 0.954 / 0.046                           | 7.60                 | 8.15                 |
| <b>2.0-Nb</b>   | 1%           | 0.320                 | 0.400                 | 2.8740       | 14.1787      | 0.907 / 0.093                           | 8.38                 | 9.46                 |
| <b>2.0-Nb</b>   | 7%           | 0.320                 | 0.400                 | 2.8729       | 14.1887      | 0.926 / 0.074                           | 7.31                 | 8.81                 |
| <b>2.0-Nb</b>   | 10%          | 0.288                 | 0.369                 | 2.8726       | 14.1924      | 0.943 / 0.057                           | 7.81                 | 8.35                 |
